# Supplementary material for: DeepTSS: multi-branch convolutional neural network for transcription start site identification from CAGE data
Source: Springer Nature journal article supplement (doi:10.1186/s12859-022-04945-y), 2022-12-12
Supplement: 12859_2022_4945_MOESM2_ESM.pdf [file 12859_2022_4945_MOESM2_ESM.pdf]

**A** Active Transcription ChromHMM Chromatin States for positive predictions

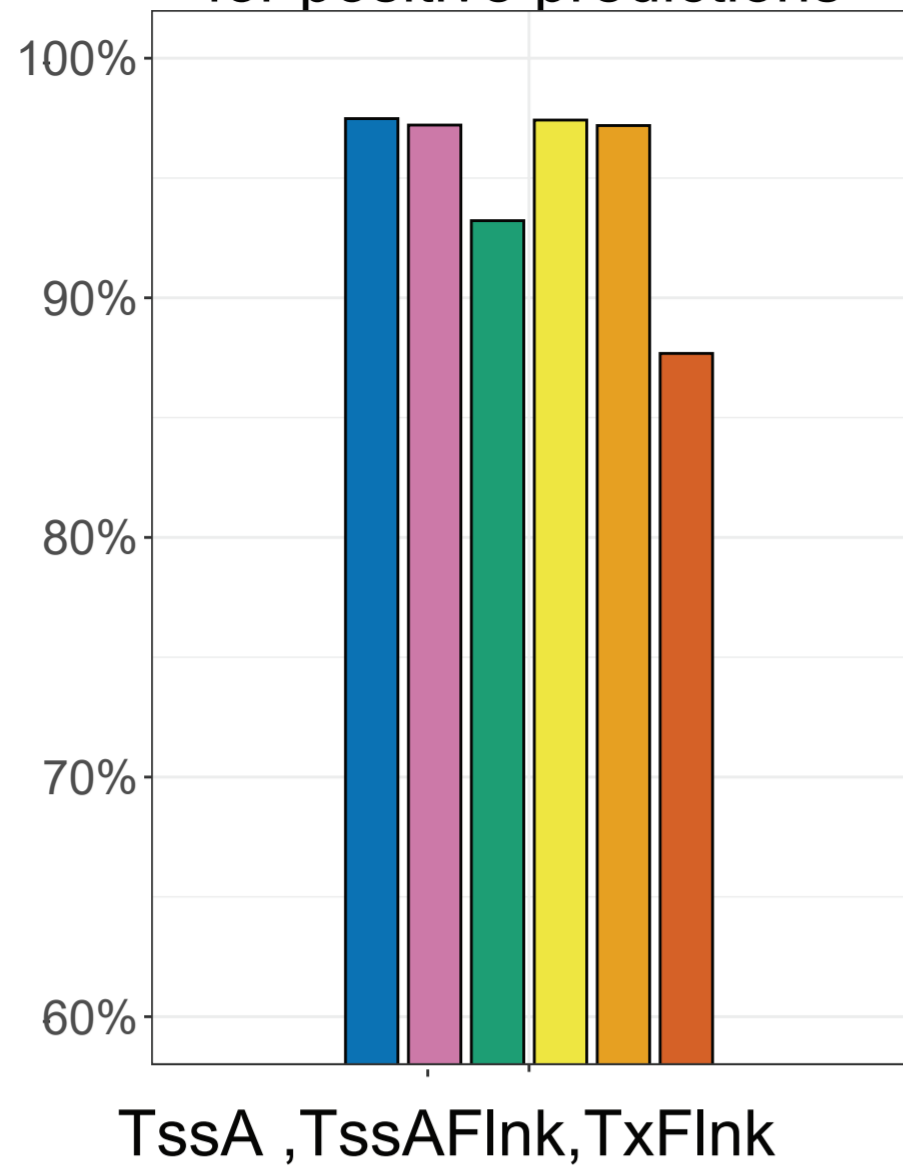

Weak Transcription/Repressed ChromHMM Chromatin States for positive predictions

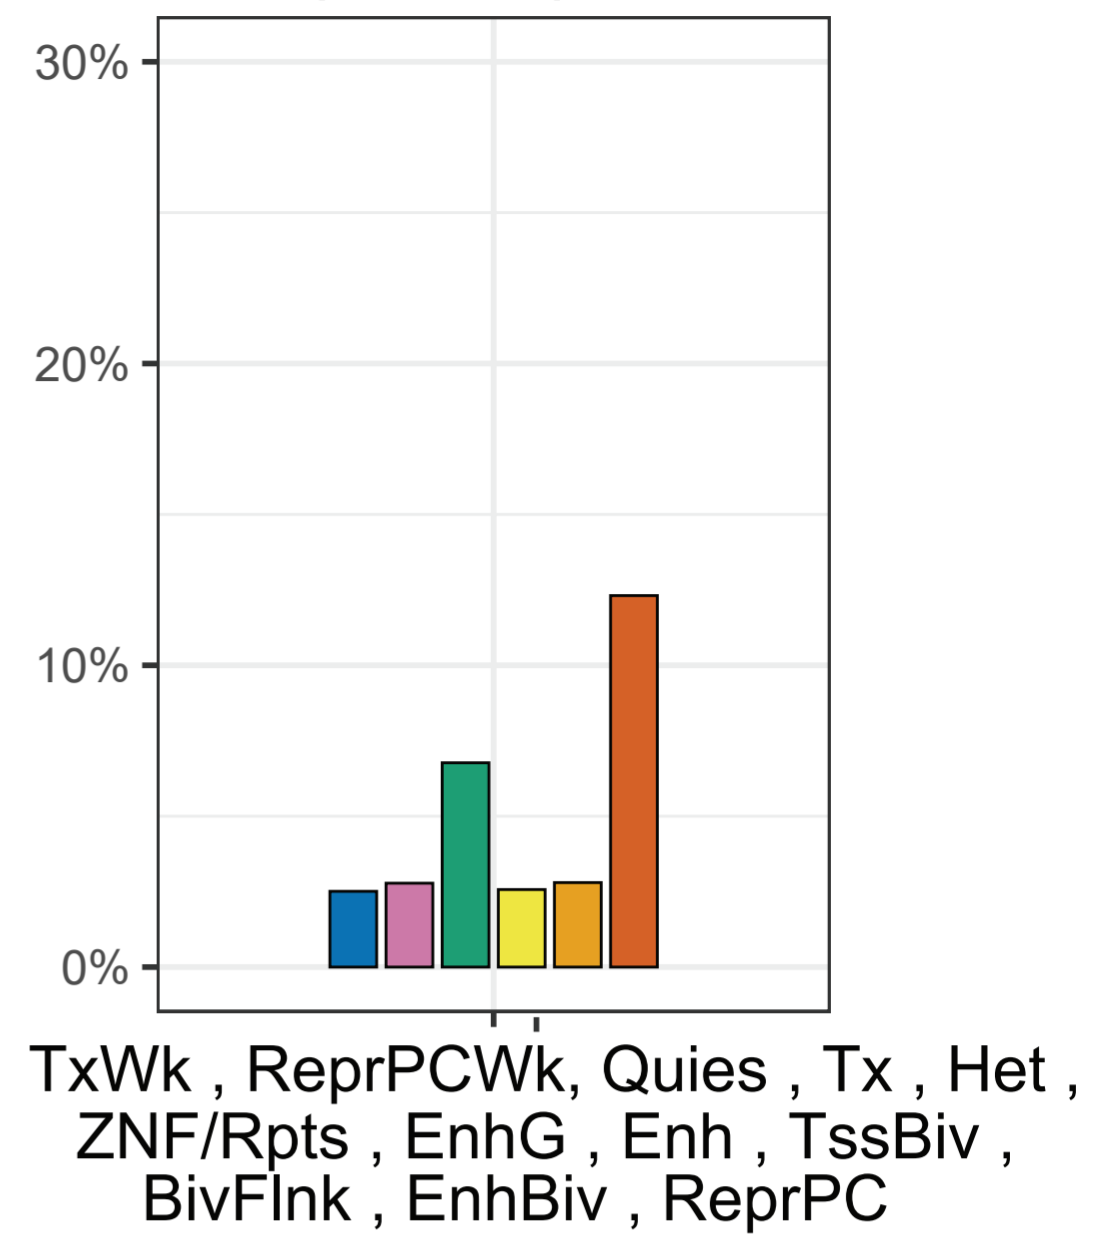

**B** Active Transcription ChromHMM Chromatin States for negative predictions

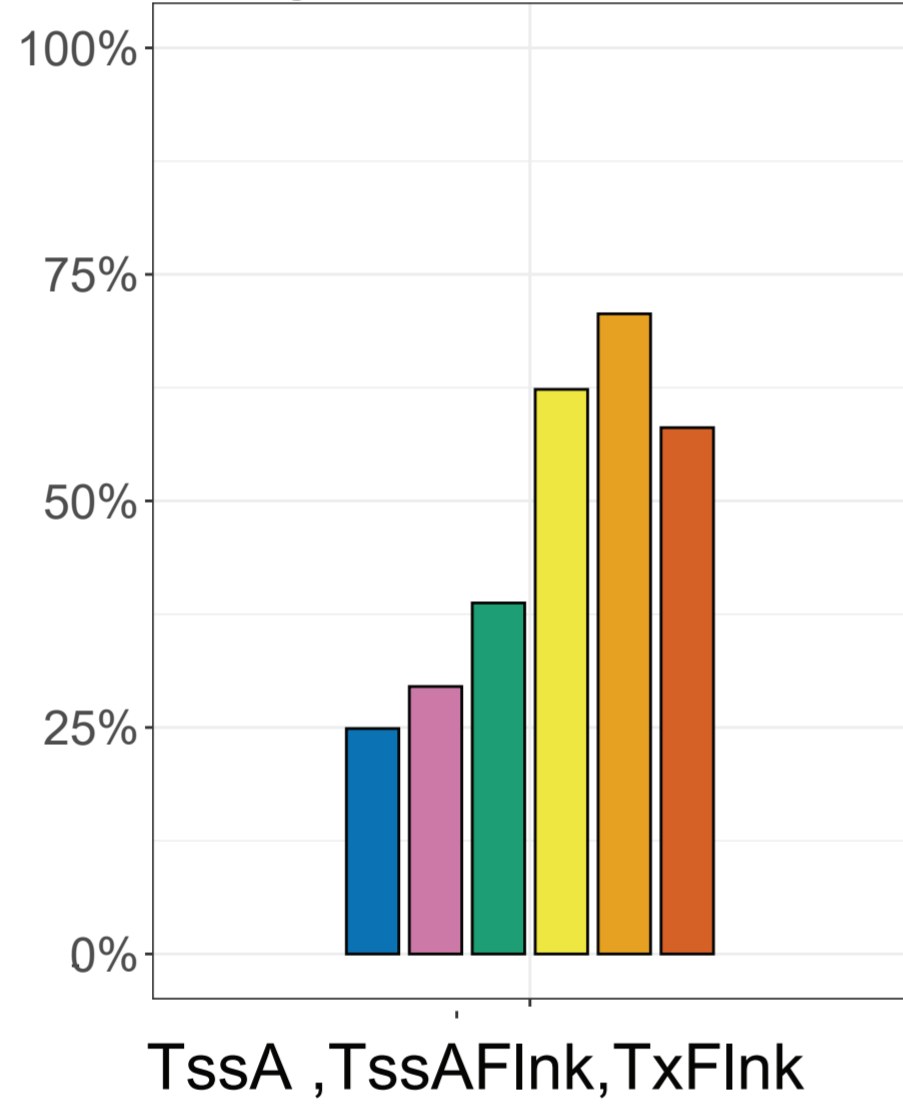

Weak Transcription/Repressed ChromHMM Chromatin States for negative predictions

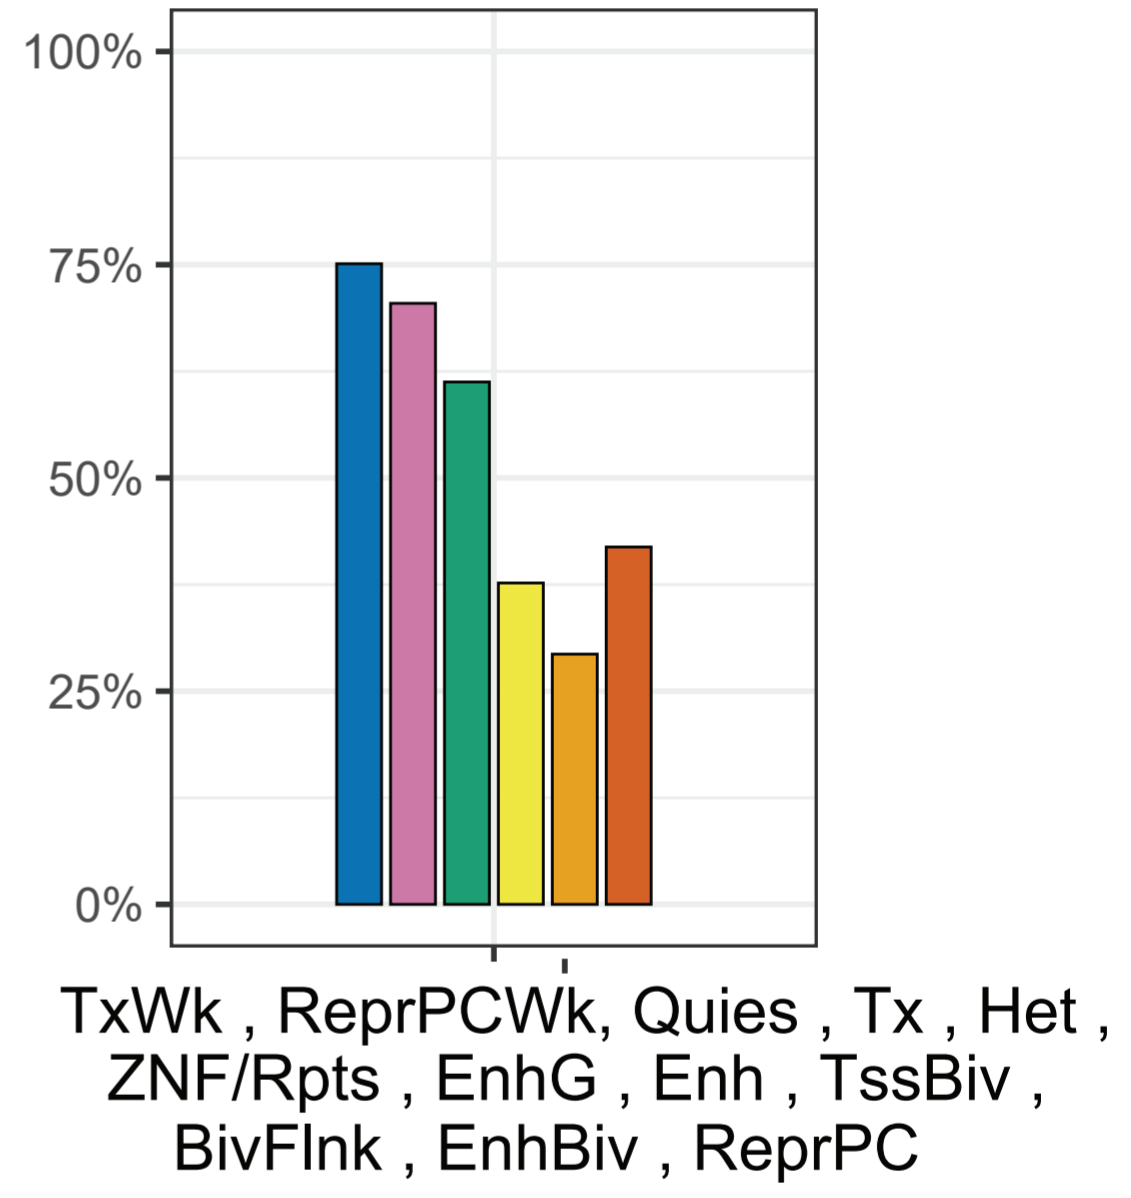

**C** Percentage of each algorithm's predictions overlapping at least one TFBS

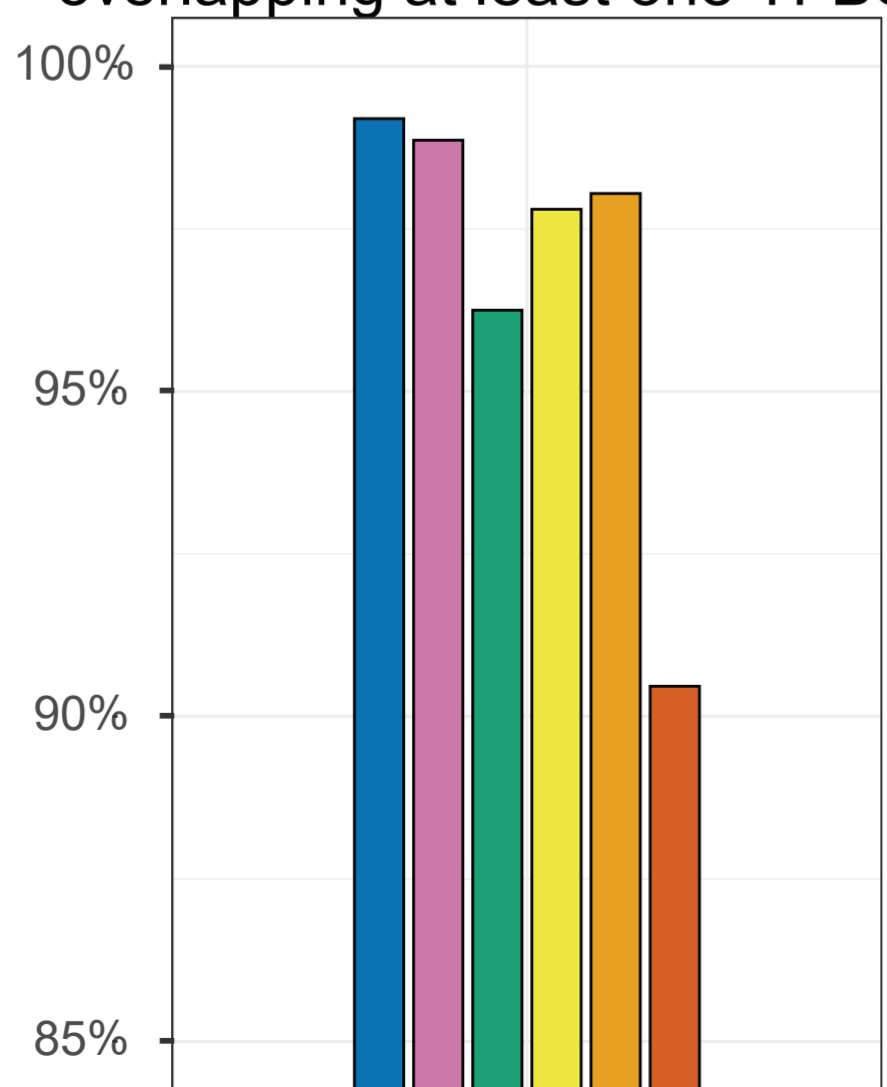

**D** Percentage of each algorithm's predictions overlapping H3K4me3 Peaks

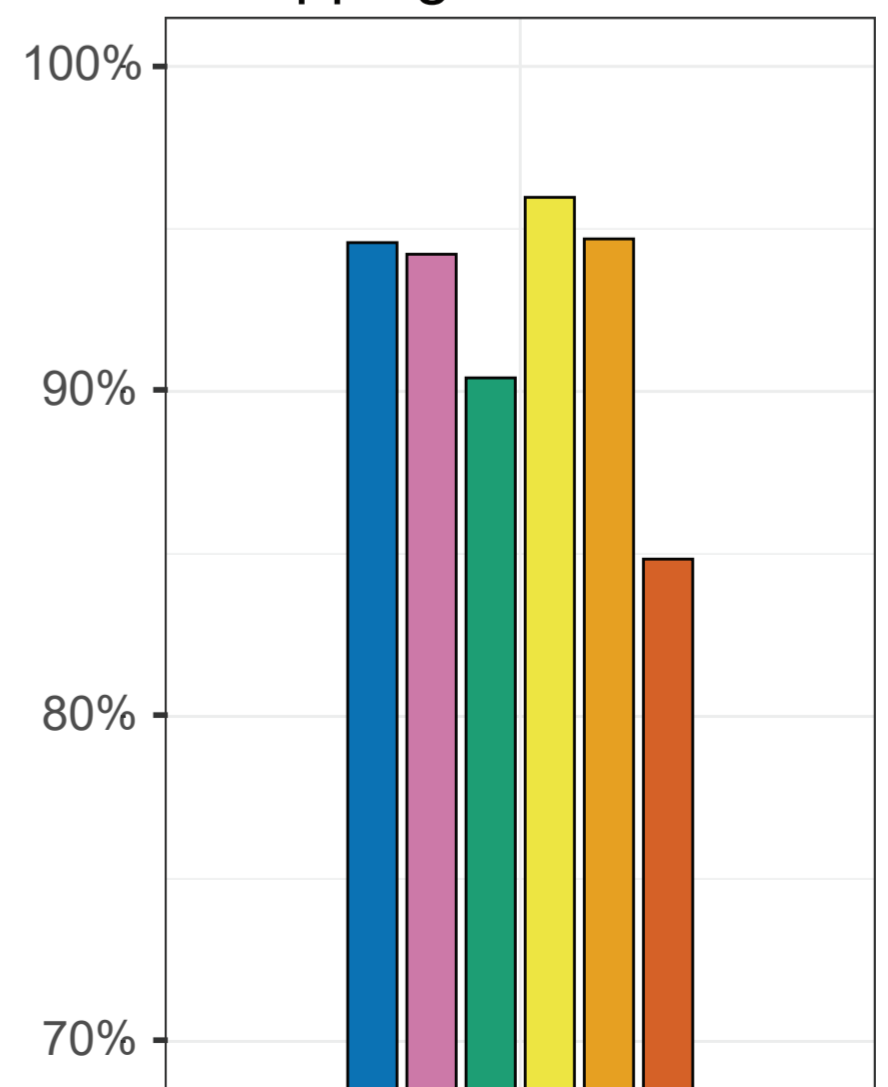

■ DeepTSS      ■ TOMETOOLS      ■ RECLU  
■ ADAPT-CAGE      ■ PARACLUS      ■ CAGER
