# Supplementary material for: DeepTSS: multi-branch convolutional neural network for transcription start site identification from CAGE data
Source: Springer Nature journal article supplement (doi:10.1186/s12859-022-04945-y), 2022-12-12

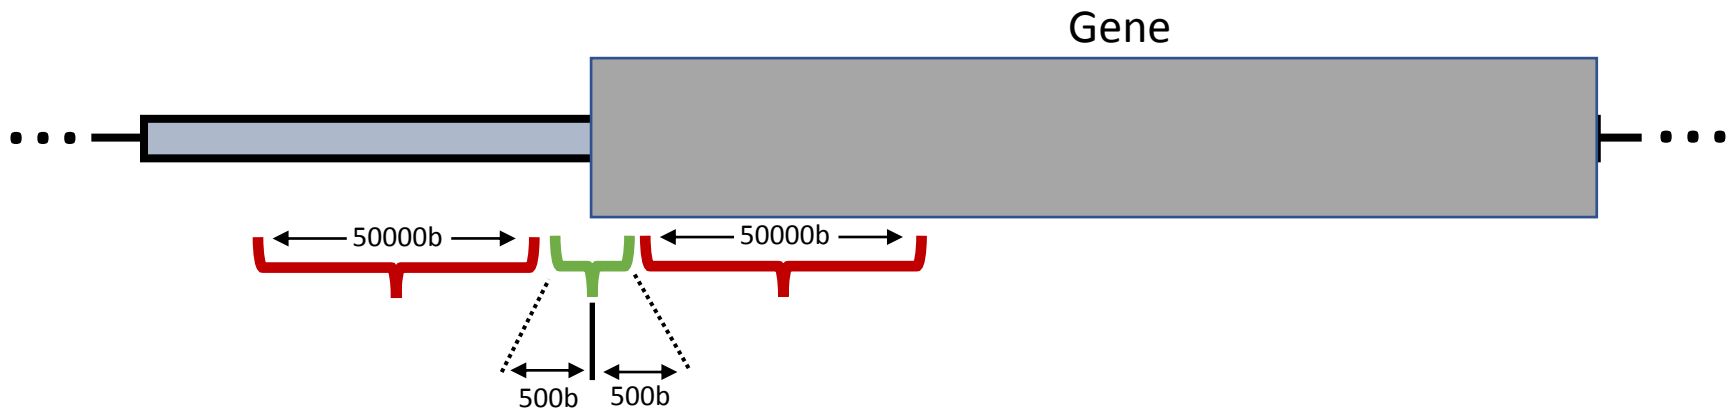

Supplement: 12859_2022_4945_MOESM3_ESM.pdf [file 12859_2022_4945_MOESM3_ESM.pdf]
